# Supplementary material for: Fabrication of pocket-like hydrogel microstructures through photolithography
Source: Royal Society of Chemistry journal article supplement (doi:10.1039/c8sm00865e), 2018-01-01
Supplement: c8sm00865e2.pdf [file c8sm00865e2.pdf]

Supporting Information for  
**Fabrication of pocket-like hydrogel microstructures through  
photolithography**

Kimio Sumaru,\* Toshiyuki Takagi, Kana Morishita, Taku Satoh, Toshiyuki Kanamori

**Materials**

Hydroxypropyl cellulose (HPC, M.W. 100,000, #19188-4, Sigma-Aldrich Co.) was used as a water-soluble hydroxyl-rich polymer composing a hydrogel sheet. Fluorescein isothiocyanate (FITC-I, Dojindo Molecular Technologies, Inc.) was used to prepare a fluorescently-functionalized HPC (fHPC). 1,3,4,6-tetrakis(methoxymethyl)glycoluril (TMMGU, #T2058, Tokyo Chemical Industry Co., Ltd.) was used as an acid catalyzed crosslinker. Polystyrene petri dish (#351008, Becton, Dickinson & Co.) with 35 mm diameter was used as a basal substrate. Human induced pluripotent stem (iPS) cell line (#201B7) was purchased from RIKEN Bioresource Center (Tsukuba, Ibaraki, Japan) and repeatedly subcultured under feeder-free condition on a substrate coated with Matrigel solution (hESC-qualified, #354277, Becton, Dickinson & Co.). ReproFF2 (ReproCELL Inc.), supplemented with 5 ng/mL human recombinant FGF-2 (bFGF, ReproCELL Inc.), was used as a culture medium for human iPSCs.

**Apparatuses**

A spin coater (ASS-301, Able Co., Ltd.) was used for polymer solution coating. Micro-patterned light irradiation was carried out by using a PC-controlled micro-projection system (DESM-01, Engineering System Co.) installed in an inverted research microscope (IX70, Olympus Co.) through a 2X objective lens (PlanApo 2X, Olympus Co.).<sup>1,2</sup> Bright field images were taken with a cooled CCD camera system (VB-7000, Keyence Co.) installed on the same microscope. 3-dimensional observation of the microstructures was carried out by using a confocal laser scanning microscope (FluoView 300, Olympus Co.) installed in an inverted research microscope (IX71, Olympus Co.).

1 K. Sumaru, J.-I. Edahiro, Y. Ooshima, T. Kanamori and T. Shinbo, *Biosens. Bioelectron.*, 2007, **22**, 2356-2359.

2 K. Sumaru and T. Kanamori, *Methods Cell Biol.*, 2014, **120**, 185-197.

## Polymer Synthesis

We synthesized a photo-acid-generating poly(methyl methacrylate) (pPAGMMA) functionalized with near UV–visible light responsive PAG moiety<sup>3</sup> at 2 mol% through the radical copolymerization of methyl methacrylate and styrene derivative having PAG group as we have already reported.<sup>4,5</sup> fHPC was synthesized by heating to dry a THF solution containing 1.0 wt% HPC and 0.10 wt% FITC-I at 110 °C.

3 M. Shirai and H. Okamura, *Prog. Org.c Coat.*, 2009, **64**, 175-181.

4 K. Sumaru, K. Kikuchi, T. Takagi, M. Yamaguchi, T. Satoh, K. Morishita and T. Kanamori, *Biotechnol. Bioeng.*, 2013, **110**, 348-352.

5 K. Sumaru, K. Morishita, T. Takagi, T. Satoh and T. Kanamori, *Eur. Polym. J.*, 2017, **93**, 733-742.

## Preparation of photoresponsive bilayer

A photoresponsive bilayer (PRBL) composed of HPC pregel layer and pPAGMMA layer was prepared as follows. Firstly, a pPAGMMA thin layer was formed by spincoating a 1.0 wt% pPAGMMA solution in 2,2,2-trifluoroethanol containing 10 wt% n-buthanol on the surface of a polystyrene petri dish under N<sub>2</sub> atmosphere. Then a methanol solution containing 5.0 wt% HPC, 0.072 wt% fHPC, 0.40 wt% TMMGU and 0.78 mM/kg H<sub>2</sub>SO<sub>4</sub> was spincoated on the pPAGMMA layer under N<sub>2</sub> atmosphere, and baked for 5 minutes at 85 °C.

## Photoresponsive lifting-off of cHPC layer from pPAGMMA layer

We examined the photoresponsive lifting-off of the HPC layer, which had been crosslinked uniformly by sulfuric acid, from a pPAGMMA layer. Fig. S1 shows the time required for the cHPC hydrogel sheet to lift off of a substrate under the light irradiation (wavelength: 436 nm, intensity: 300 mW/cm<sup>2</sup>) dependent on the composition of the ethanol-water mixed solvent. After the lifting-off, the cHPC layer reached the fully swelled state in a minute.

## Adhesion of cells captured in pocket-like structures

We examined to introduce Madin-Darby canine kidney cells (RIKEN Bioresource Center, Tsukuba, Ibaraki, Japan) into pocket-like hydrogel structures and cultured. Fig. S2 shows the microscopic image of the system after “kangaroo culture” for 1 day. The cells adhered spreading on the surface of the substrate appearing after the lifting-off of cHPC hydrogel sheet.

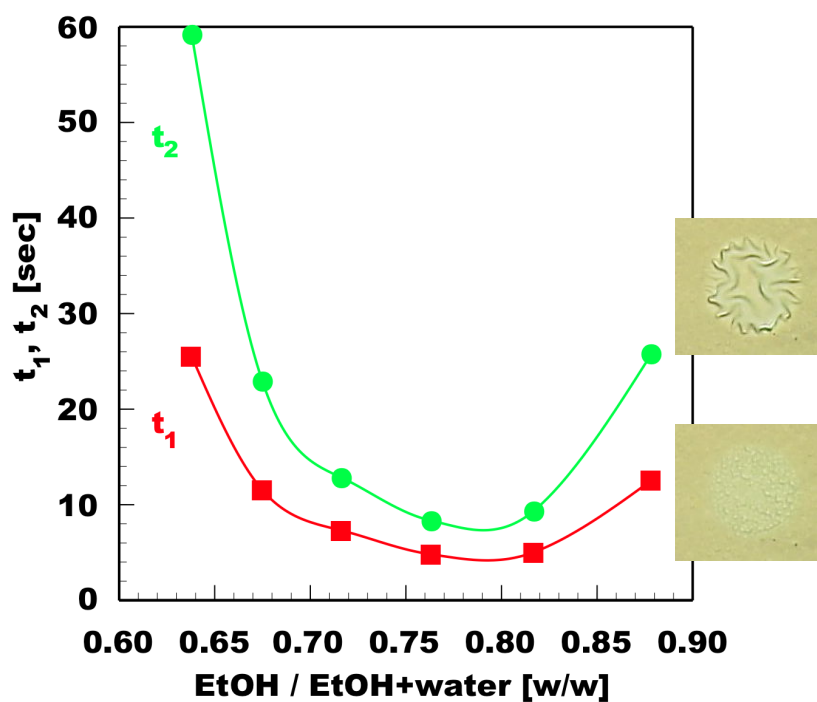

**Fig. S1** Lifting-off rate of the cHPC hydrogel sheet under the light irradiation (wavelength: 436 nm, intensity: 300 mW/cm<sup>2</sup>) dependent on the composition of the ethanol-water mixed solvent.  $t_1$  and  $t_2$  are the times when the cHPC hydrogel sheet to start to lift off and to accomplish lifting off, respectively.

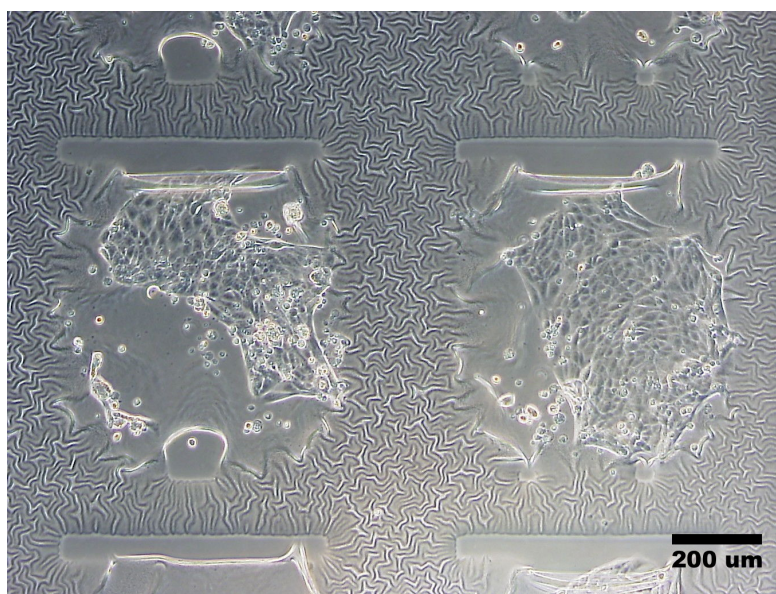

**Fig. S2** Microscopic image of MDCK cells after “kangaroo culture” in pocket-like microstructures composed of hydrogel sheet.

### **Fabrication of balloon-like microstructures composed of partially hydrolyzed polyvinyl acetate**

We examined to fabricate balloon-like microstructures using 40% hydrolyzed polyvinyl acetate (PVAcH, M.W. 72,000, #17561, Polysciences, Inc.) instead of HPC. A methanol solution containing 4.7 wt% PVAcH and 0.23 wt% TMMGU was used as a pregel solution. Fig. S3 shows the microscopic image of the microstructures in 80% ethanol.

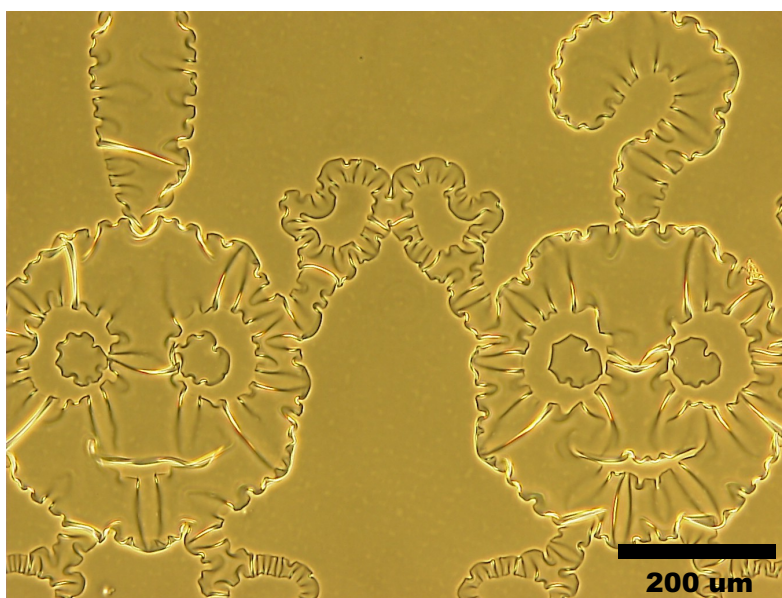

**Fig. S3** Fabricated balloon-like microstructures composed of partially hydrolyzed polyvinyl acetate in 80% ethanol.

#### **Supporting movie**

An animation to help understanding of the 3-dimensional structure of a hollow trapezoidal circular cone structure composed of cHPC hydrogel sheet can be seen in the movie **SumaruAnim3D.avi**.
